# Supplementary material for: Metabolomics Analysis of DRG and Serum in the CCI Model of Mice
Source: MDPI journal article supplement (doi:10.3390/brainsci13081224), 2023-08-21
Supplement: s1 [file s1]

## supplementary

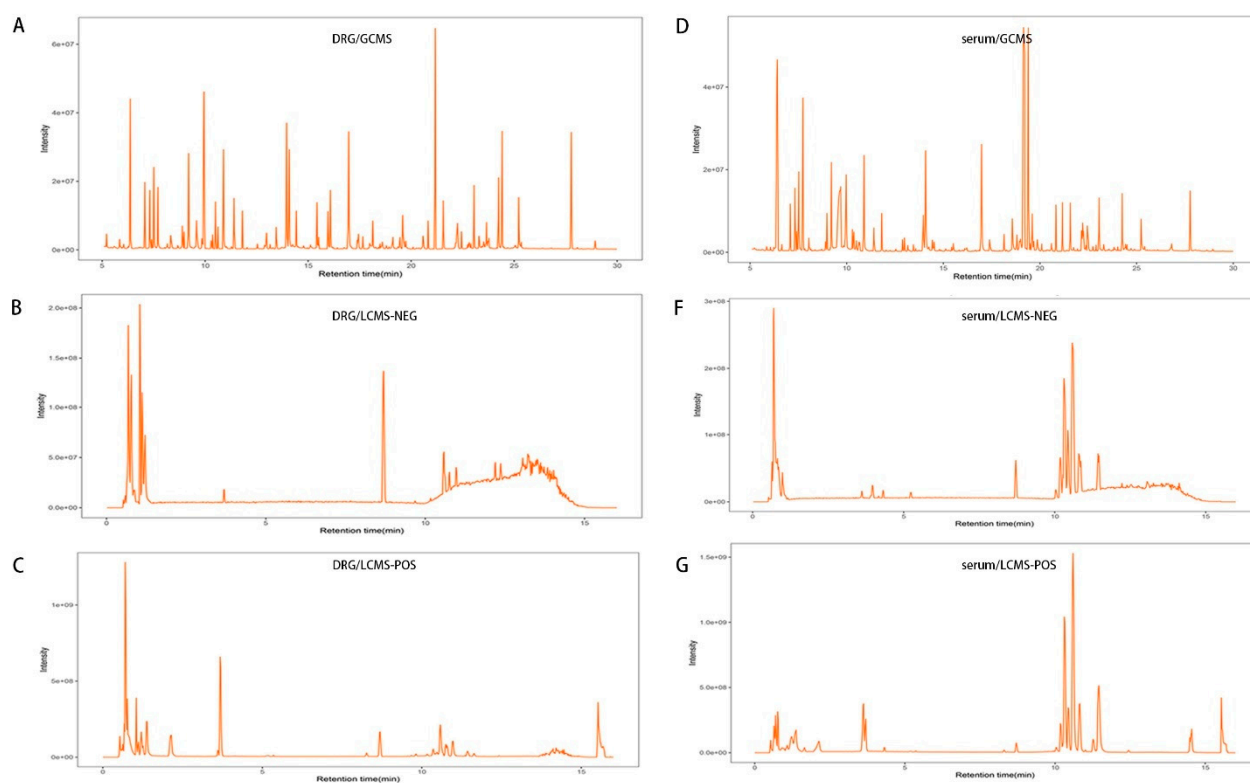

**Figure S1.** Total ion chromatogram of DRG extract acquired by GC-MS (A). The base peak chromatograms (BPIs) of DRG extract acquired by LC-MS in the positive (B) and negative (C) ion modes. Total ion chromatogram of serum extract acquired by GC-MS (D). The base peak chromatograms (BPIs) of serum extract acquired by LC-MS in the positive (F) and negative (G) ion modes.
